# Supplementary material for: P2X4 receptor controls microglia activation and favors remyelination in autoimmune encephalitis
Source: PubMed Central journal article supplement (PMC6079537; doi:10.15252/emmm.201708743), 2018-07-04
Supplement: EMMM-10-e8743-s001.pdf [file EMMM-10-e8743-s001.pdf]

**Appendix:** P2X4 receptor controls microglia activation and favours remyelination in autoimmune encephalitis

**Table of contents:**

Appendix supplementary methods

Appendix Figure S1

Appendix Figure S2

Appendix Figure S3

## **Appendix Supplementary Methods**

### ***T cell proliferation and cytokine production***

To measure proliferation, splenocytes were labeled with eFluor670 proliferation dye (5  $\mu$ M, eBioscience), washed and stimulated with anti-CD3/CD28 (1  $\mu$ g/ml). On day 3 cells were stained with anti-CD4 (#100509, 1:100, Biolegend) and anti-CD8 (#100732, 1:100, Biolegend). Proliferation was measured by dilution of eFluor670 and quantified as division index using FlowJo Software (Treestar).

To measure cytokine production, splenocytes were stimulated for 4h with phorbol-12-myristat-13-acetat (PMA, 50 ng/ml, Sigma) and ionomycin (1  $\mu$ M, Sigma). Cells were washed and stained with anti-CD4 (#100509, 1:100, Biolegend), anti-CD8 (#100732, 1:100, Biolegend), anti- $\gamma\delta$ TCR (#118119, 1:100, Biolegend). Cells were fixed with 4 % paraformaldehyde (PFA, Sigma), permeabilized with 0.5% saponin buffer and stained for anti-IFN $\gamma$  (#54413, 1:100, BD Bioscience) and anti-IL-17A (#12-7177-81, 1:100, eBioscience) and intracellular cytokines were measured by FACS (LSRFortessa, BD).

### ***Immunocytochemistry***

Primary antibodies were used as follow to: iNOS (#610329, 1:500, BD Bioscience), MRC1 (#ab64693, 1:1000, Abcam), NG2 (#AB5320, 1:500, Abcam), Iba1 (#019-19741, 1:1000; Wako), MBP (#SMI-99P, 1:500, Covance), Olig2 (#MABN50, 1:400, Millipore), P2X7R (#APR-004, 1:100, Alomone), P2X4R (#APR-002, 1:400, Alomone) and extracellular P2X4R (#APR-024, 1:400, Alomone). We used the following secondary antibodies goat anti-rabbit Alexa Fluor 488 (A11008, 1:200, Invitrogen) and goat anti-mouse Alexa Fluor 594 (A11032, 1:200, Invitrogen). For isolectin B4 (IB4) staining, live cultures were incubated for 30 min with IB4 (#FL 1201, 1:100, Vector),

washed with PBS, fixed in 4% PFA in PBS for 20 min and processed for conventional immunocytochemistry.

### **FACS**

CD4-Bv605 (#100547, 1:100, Biolegend), CD8-perCP (#100732, 1:100, Biolegend),  $\gamma\delta$ TCR-Bv650 (#118129, 1:100, Biolegend), CD3e-Bv421 (#100228, 1:100, Biolegend), CD45APC-eFluor780 (#47-0451-82, 1:100, eBioscience), Ly6G-AF700 (#127622, 1:100, Biolegend), CD11b-FITC (#101205, 1:100, Biolegend), CD11c-APC (#17-0114-82, 1:100, eBioscience).

### **qPCR primers**

#### **Sequences for mouse primers used for qPCR**

| <b>Target gene</b> | <b>Forward (5'-&gt;3')</b>     | <b>Reverse (5'-&gt;3')</b> |
|--------------------|--------------------------------|----------------------------|
| <i>Arg1</i>        | GGATTGGCAAGGTGATGGAA           | CGACATCAAAGCTCAGGTGAA      |
| <i>Bdnf</i>        | TCCAAAGGCCAACTGAAGCA           | CTGCAGCCTTCCTTGGTGTA       |
| <i>Ccl2</i>        | AGCAGCAGGTGTCCCAA              | TTCTTGGGGTCAGCACAGAC       |
| <i>Ccr7</i>        | GTGGTGGCTCTCCTTGTC             | GGTATTCTCGCCGATGTAGTCA     |
| <i>Chi3l3</i>      | GCCCACCAGGAAAGTACACA           | CCTCAGTGGCTCCTTCATTCA      |
| <i>Clec7a</i>      | ACCACAAGCCCACAGAATCA           | AGGAAGGCAAGGCTGAGAAA       |
| <i>Foxp3</i>       | ACCACACTTCATGCATCAGCTC         | GGCTGGGTTGTCCAGTGGAC       |
| <i>Ifny</i>        | TAACTATTTAACTCAAGTGGCATAGATGTG | GCCAGTTCCTCCAGATATCCAAG    |
| <i>Il10</i>        | AAAGGACCAGCTGGACAACA           | TAAGGCTTGGCAACCCAAGTA      |
| <i>Il12a</i>       | AAACCAGCACATTGAAGACC           | GGAAGAAGTCTCTCTAGTAGCC     |
| <i>Il1b</i>        | TGGCAACTGTTCTGAACTCA           | GGGTCCGTCAACTTCAAAGAAC     |
| <i>Il4</i>         | ACGGAGATGGATGTGCCAAA           | GAAGCACCTTGAAGCCCTA        |
| <i>Il6</i>         | CGATGATGCACTTGCAGAAA           | ACTCCAGAAGACCAGAGGAA       |
| <i>Irf5</i>        | TGATGTCAAACCCCGAGAGAA          | GAACATCTCCAGCAGCAACC       |
| <i>Irf8</i>        | GATATGCCGCCTATGACACA           | CCCGTAGTAGAAGCTGATGAC      |
| <i>Jak3</i>        | CATAGAGGACGTGGACACTCAA         | TGACATGTCTCCAGCCCAA        |
| <i>Marco</i>       | TTCTGTGCGATGCTCGGTTA           | TTGTCCAGCCAGATGTTCCC       |
| <i>Mbp</i>         | CCCTCACAGCGATCCAAGTA           | CTCTGTGCCTTGGGAGGAA        |
| <i>Mr1</i>         | GCTCGCTGTATTCTTGGTGAA          | ACCAGGATCGGAAACAGCTA       |
| <i>Mrc1</i>        | CACAAAGCCATGCTGTAGTACC         | GTAAAACCCATGCCGTTTCCA      |
| <i>Msx3</i>        | CTCCAGTCGCGCACTCTT             | CCGTGGTTTGCGATTGGTTT       |
| <i>Nos2</i>        | GAGGAGCAGGTGGAAGACTA           | GGAAAAGACTGCACCGAAGATA     |

|               |                         |                           |
|---------------|-------------------------|---------------------------|
| <i>P2rx4</i>  | TTTGCGATTGACAGCGCCAAC   | ATGGAACACACCTTCCAGTCC     |
| <i>Ptgs2</i>  | CTTCTCCCTGAAGCCGTACA    | TGCTACTGTAGAGGGCTTTCAA    |
| <i>Retnla</i> | ATCCCTCCACTGTAACGAAGAC  | ACAAGCACACCCAGTAGCA       |
| <i>Ror</i>    | ACTGAAAGCAGGAGCAATGGAAG | TTCAAAAAAGACTGTGTGGTTGTTG |
| <i>Stat1</i>  | GCAGGTGTTGTCAGATCGAAC   | ATGCACGGCTGTCGTTCTA       |
| <i>Stat3</i>  | TGGGCATCAATCCTGTGGTA    | CCAATTGGCGGCTTAGTGAA      |
| <i>Stat6</i>  | TGACTTTCCACAACGCCTAC    | CATCTGAACCGACCAGGAAC      |
| <i>Tgfb1</i>  | GCTGCGCTTGACAGAGATTA    | GTAACGCCAGGAATTGTTGCTA    |
| <i>Tnf</i>    | GGGTGATCGGTCCCAAA       | TGAGGGTCTGGGCCATAGAA      |

| <b>Housekeeping gene</b> | <b>Forward (5'-&gt;3')</b> | <b>Reverse (5'-&gt;3')</b> |
|--------------------------|----------------------------|----------------------------|
| <i>B2m</i>               | ACTGACCGGCCTGTATGCTA       | ATGTTTCGGCTTCCCATTCTCC     |
| <i>Gapdh</i>             | AGACGGCCGCATCTTCTT         | TTCACACCGACCTTACCAT        |
| <i>Hprt</i>              | CAGTACAGCCCCAAAATGGTTA     | AGTCTGGCCTGTATCCAACA       |
| <i>Ppia</i>              | AGGGTTCCTCCTTTCACAGAA      | TGCCGCCAGTGCCATTA          |

#### Sequences for rat primers used for qPCR

| <b>Target gene</b> | <b>Forward (5'-&gt;3')</b> | <b>Reverse (5'-&gt;3')</b> |
|--------------------|----------------------------|----------------------------|
| <i>Arg1</i>        | GTGAAGAACCACGGTCTGTG       | GAGATGCTTCCAATTGCCATACTG   |
| <i>Ccl2</i>        | GTGCTGTCTCAGCCAGATGCA      | GCTGCTGGTATTCTTGTAGTT      |
| <i>Mrc1</i>        | AAGTTTAAGCACTGGCTGGCA      | CAGGTTCTGATGATGGACTTCCTG   |
| <i>Nos2</i>        | GAGATTTTTTACGACACCCCTTAC   | CATGCATAATTTGGACTTGCAAG    |

| <b>Housekeeping gene</b> | <b>Forward (5'-&gt;3')</b> | <b>Reverse (5'-&gt;3')</b> |
|--------------------------|----------------------------|----------------------------|
| <i>Cyclophilin A</i>     | CAAAGTTCAAAGACAGCAGAAAA    | CCACCCTGGCACATGAATC        |
| <i>Gapdh</i>             | GAAGGTCGGTGTCAACGGATTT     | CAATGTCCACTTTGTCACAAGAGA   |
| <i>Hprt</i>              | ATGGACTGATTATGGACAGGACTGA  | ACACAGAGGGCCACAATGTG       |

## Appendix Figures

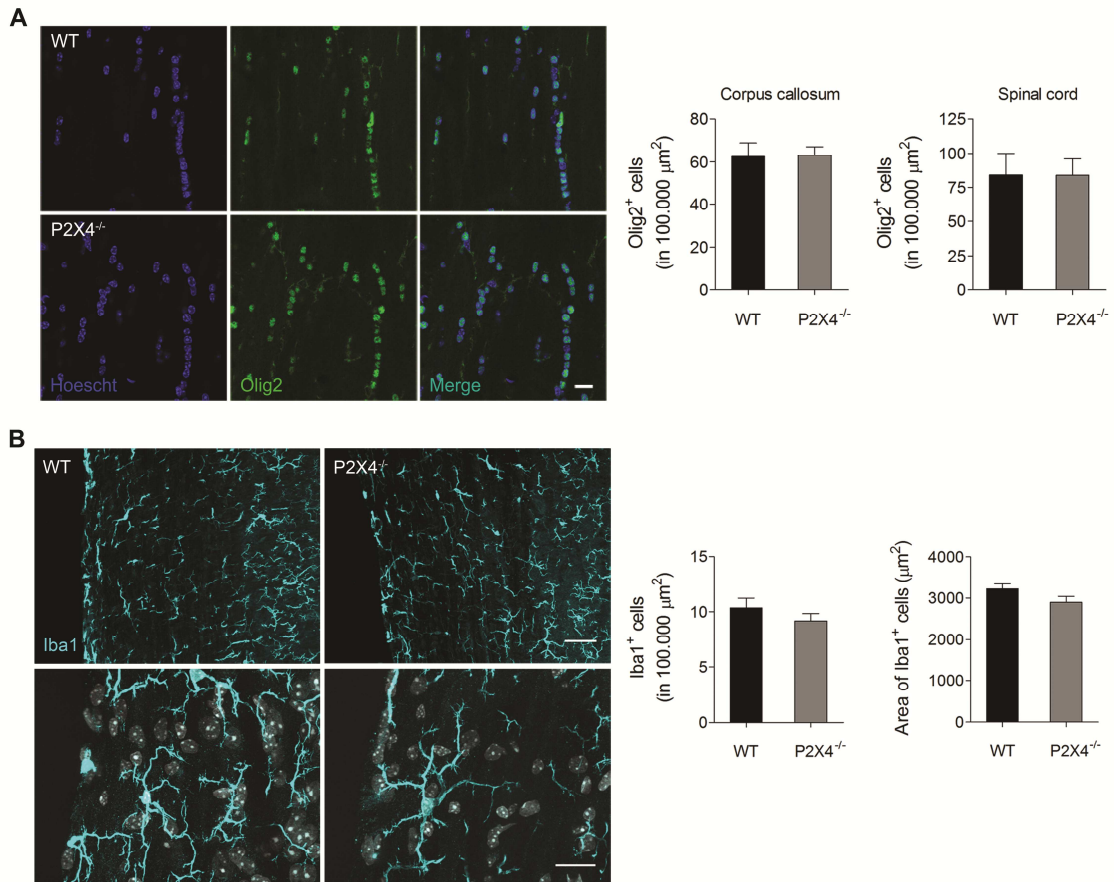

**Appendix Figure S1. Microglia and oligodendroglial characterization of WT and P2X4<sup>-/-</sup> mice.**

A Immunohistochemistry analysis of Olig2, a marker of oligodendrocytes in corpus callosum and spinal cord of WT and P2X4<sup>-/-</sup> mice. Images show representative fields in corpus callosum (n = 3). Scale bar = 20 μm.

B Immunohistochemistry analysis of Iba1, a marker of microglia in the spinal cord of WT and P2X4<sup>-/-</sup> mice (n = 3). Scale bar = 50 (top) and 20 (bottom) μm.

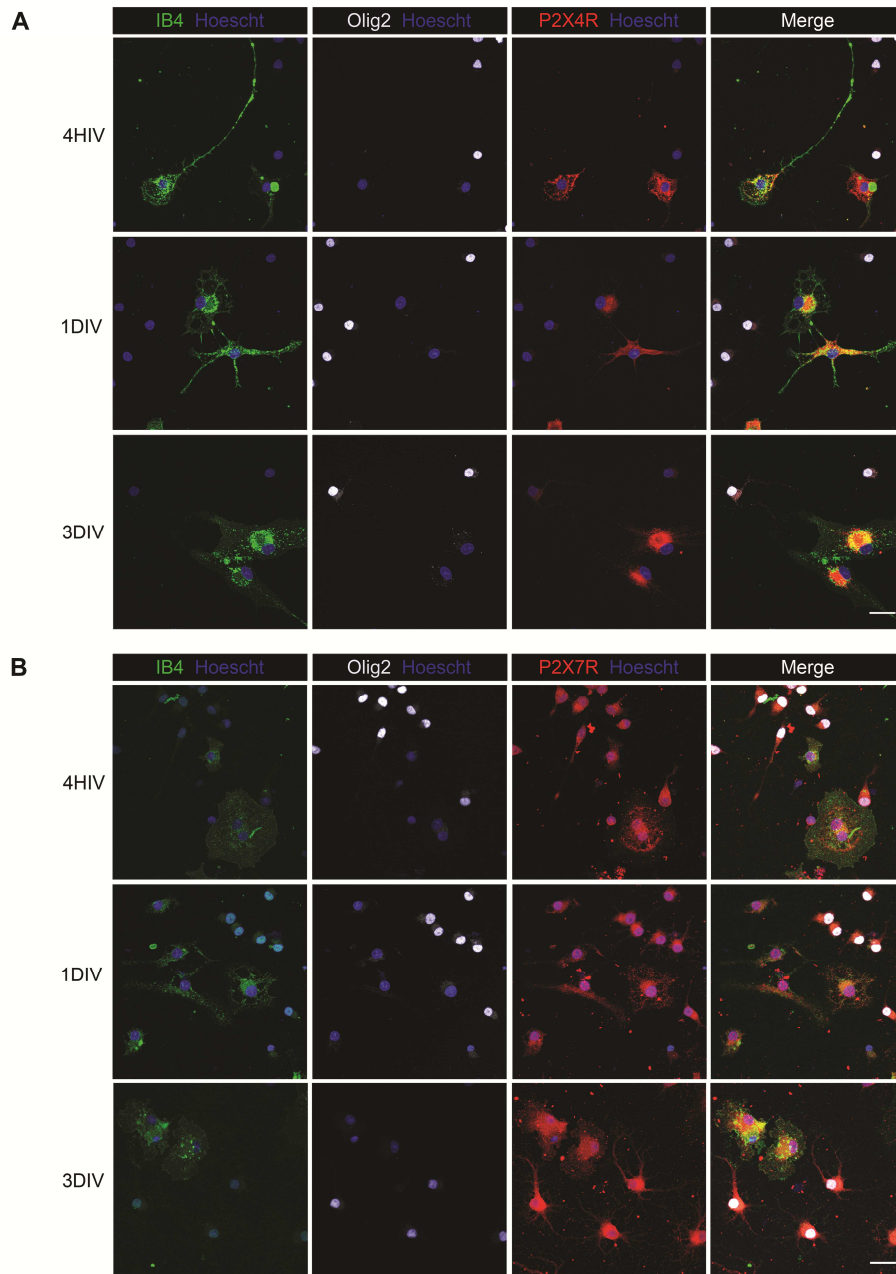

**Appendix Figure S2. P2X4R is expressed predominantly in microglia.**

A-B) Representative images of microglia-OPCs coculture stained for P2X4R (A; red) or P2X7R (B; red), Olig2 (white), isolectin B4 (IB4; green) and Hoechst (blue) at different stages of oligodendrocyte development, 4 hours in vitro (HIV), 1 day in vitro (DIV) and 3 DIV. Scale bar = 20  $\mu$ m

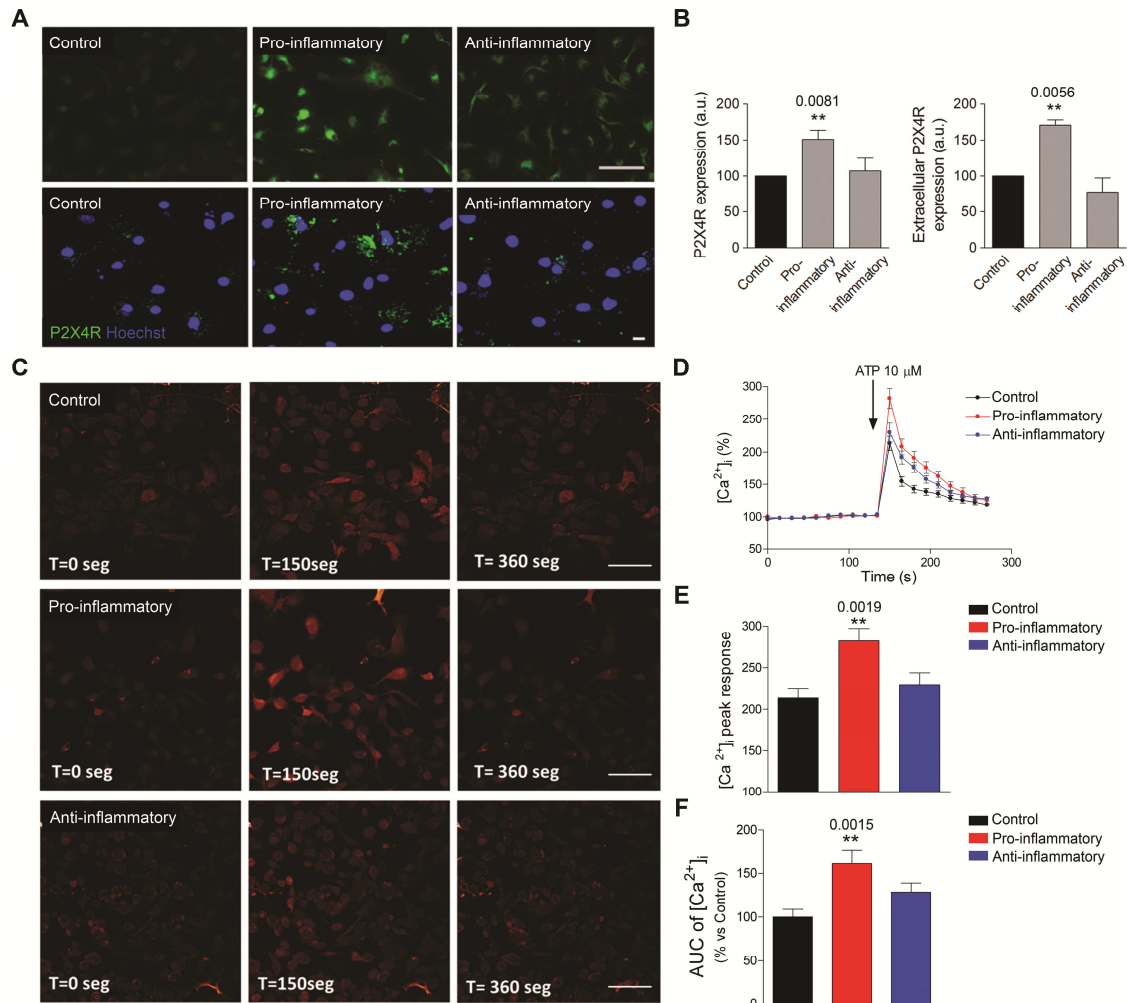

**Appendix Figure S3. P2X4R expression and function in differentially polarized microglia.**

A, B) Total P2X4R (green, top) (n = 5) or extracellular P2X4R (green, bottom) (n = 3) expression in control, pro-inflammatory and anti-inflammatory microglia phenotypes. Scale Bar= 80  $\mu$ m (top) and 10  $\mu$ m (bottom).

C-F) Calcium responses to ATP (10  $\mu$ M) in control, pro-inflammatory and anti-inflammatory microglia: Representative images at 0, 150 and 360 seconds. ATP was applied at t=150s (n = 150 cells from 3 different cultures). Scale Bar= 80  $\mu$ m.
