# Supplementary material for: P2X4 receptor controls microglia activation and favors remyelination in autoimmune encephalitis
Source: PubMed Central journal article supplement (PMC6079537; doi:10.15252/emmm.201708743), 2018-07-04

# Figure 6D

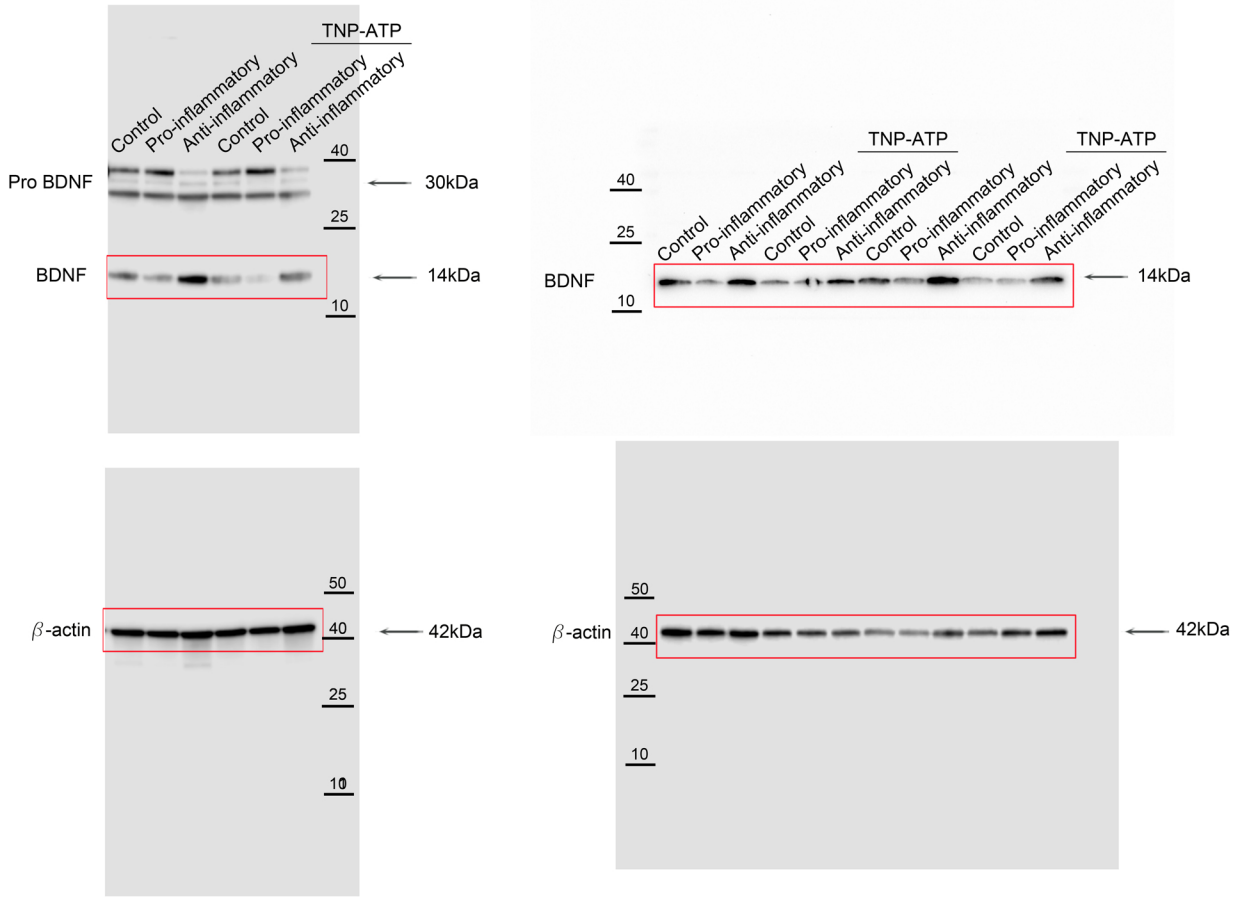

# Figura 6F

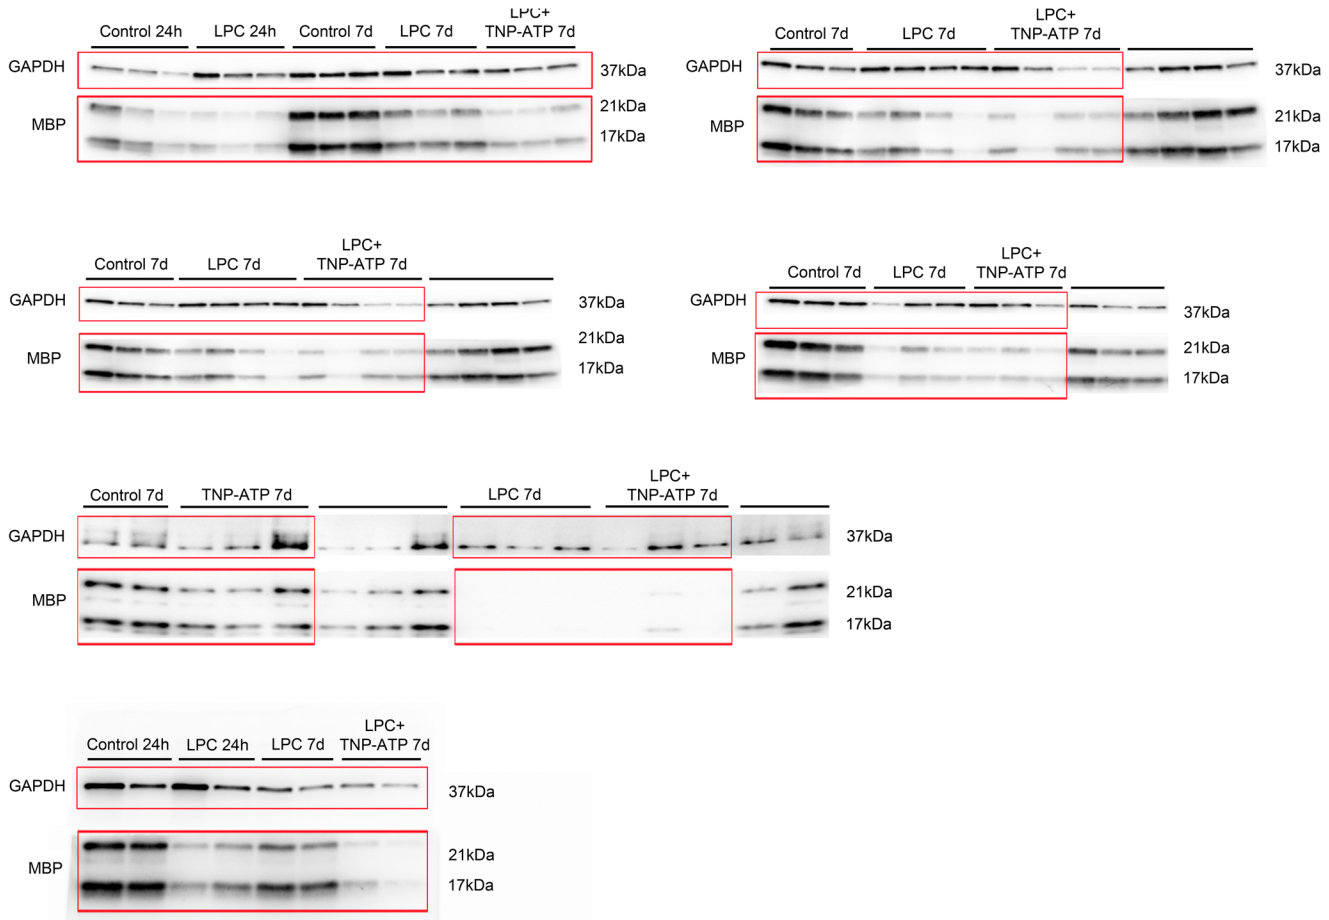

Supplement: EMMM-10-e8743-s003.pdf [file EMMM-10-e8743-s003.pdf]
