# Supplementary material for: P2X4 receptor controls microglia activation and favors remyelination in autoimmune encephalitis
Source: EMBO Mol Med. 2018 Jul 4;10(8):e8743. doi: 10.15252/emmm.201708743 (PMC6079537; doi:10.15252/emmm.201708743)
Supplement: Supplementary file 2 — Expanded View Figures PDF [file EMMM-10-e8743-s002.pdf]

Expanded View Figures

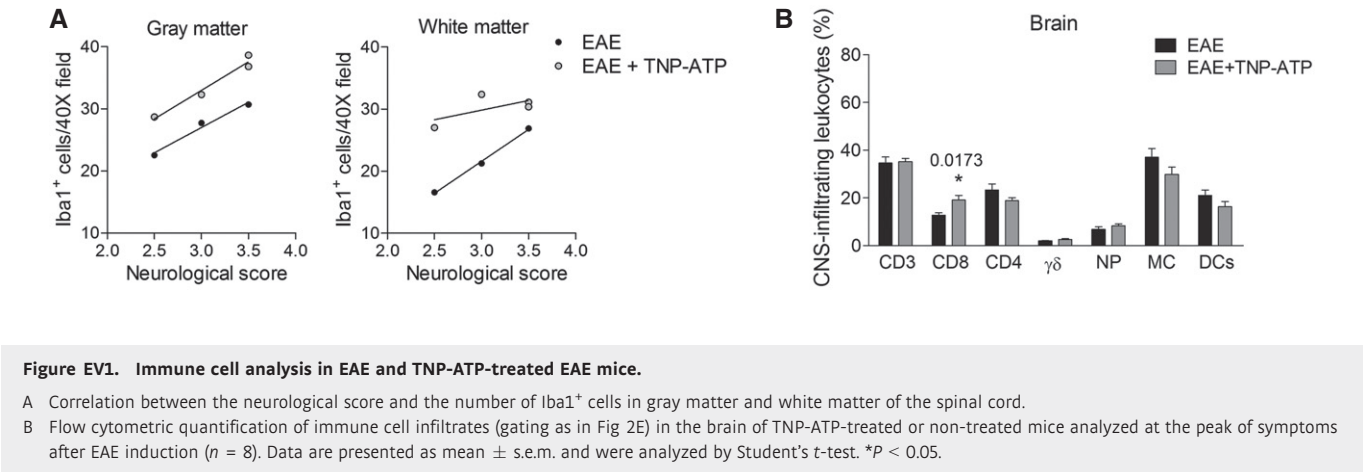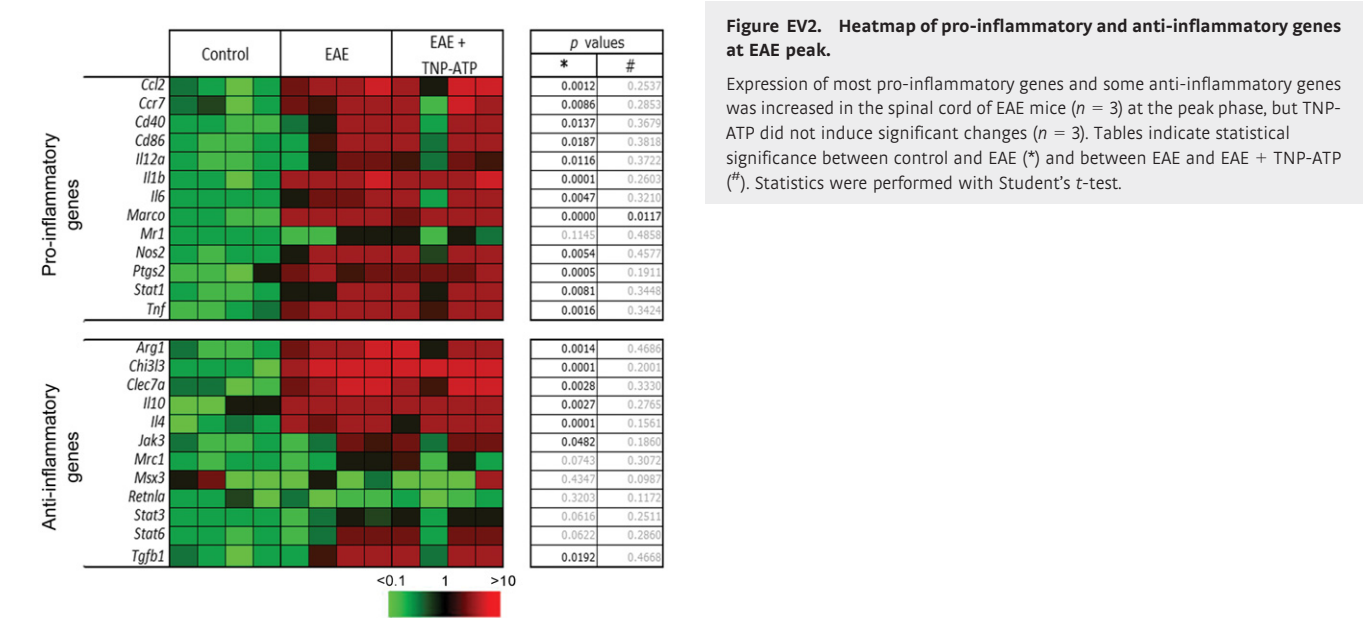

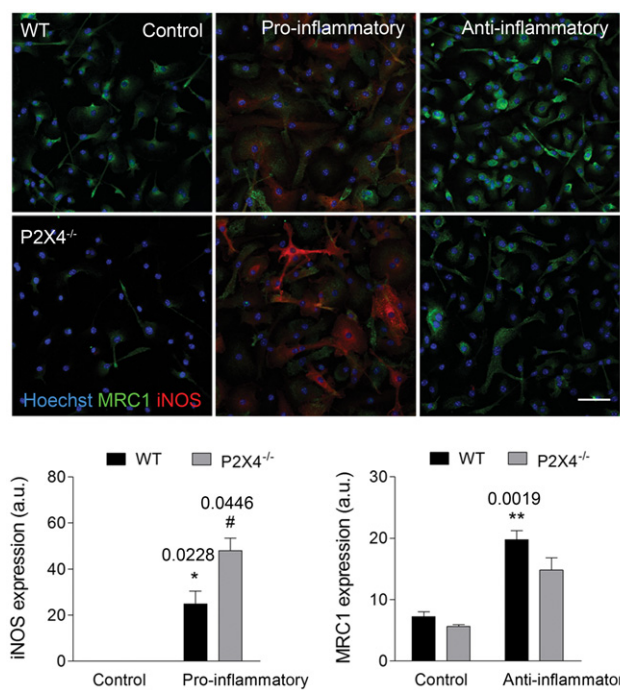

**Figure EV3. Pro-inflammatory and anti-inflammatory polarization in wild-type and P2X4<sup>-/-</sup> microglia.**

Staining for iNOS (red) and mannose receptor (MRC1, green) in control, pro-inflammatory, and anti-inflammatory microglia from wild-type and P2X4<sup>-/-</sup> mice. Scale bar = 50  $\mu$ m ( $n = 4$  experiments performed in triplicate). Data are presented as mean  $\pm$  s.e.m. and were analyzed by Student's  $t$ -test. \* $^{\#}P < 0.05$ , \*\* $P < 0.01$ . Symbols indicate significance versus control (\*) or versus pro-/anti-inflammatory microglia ( $^{\#}$ ).

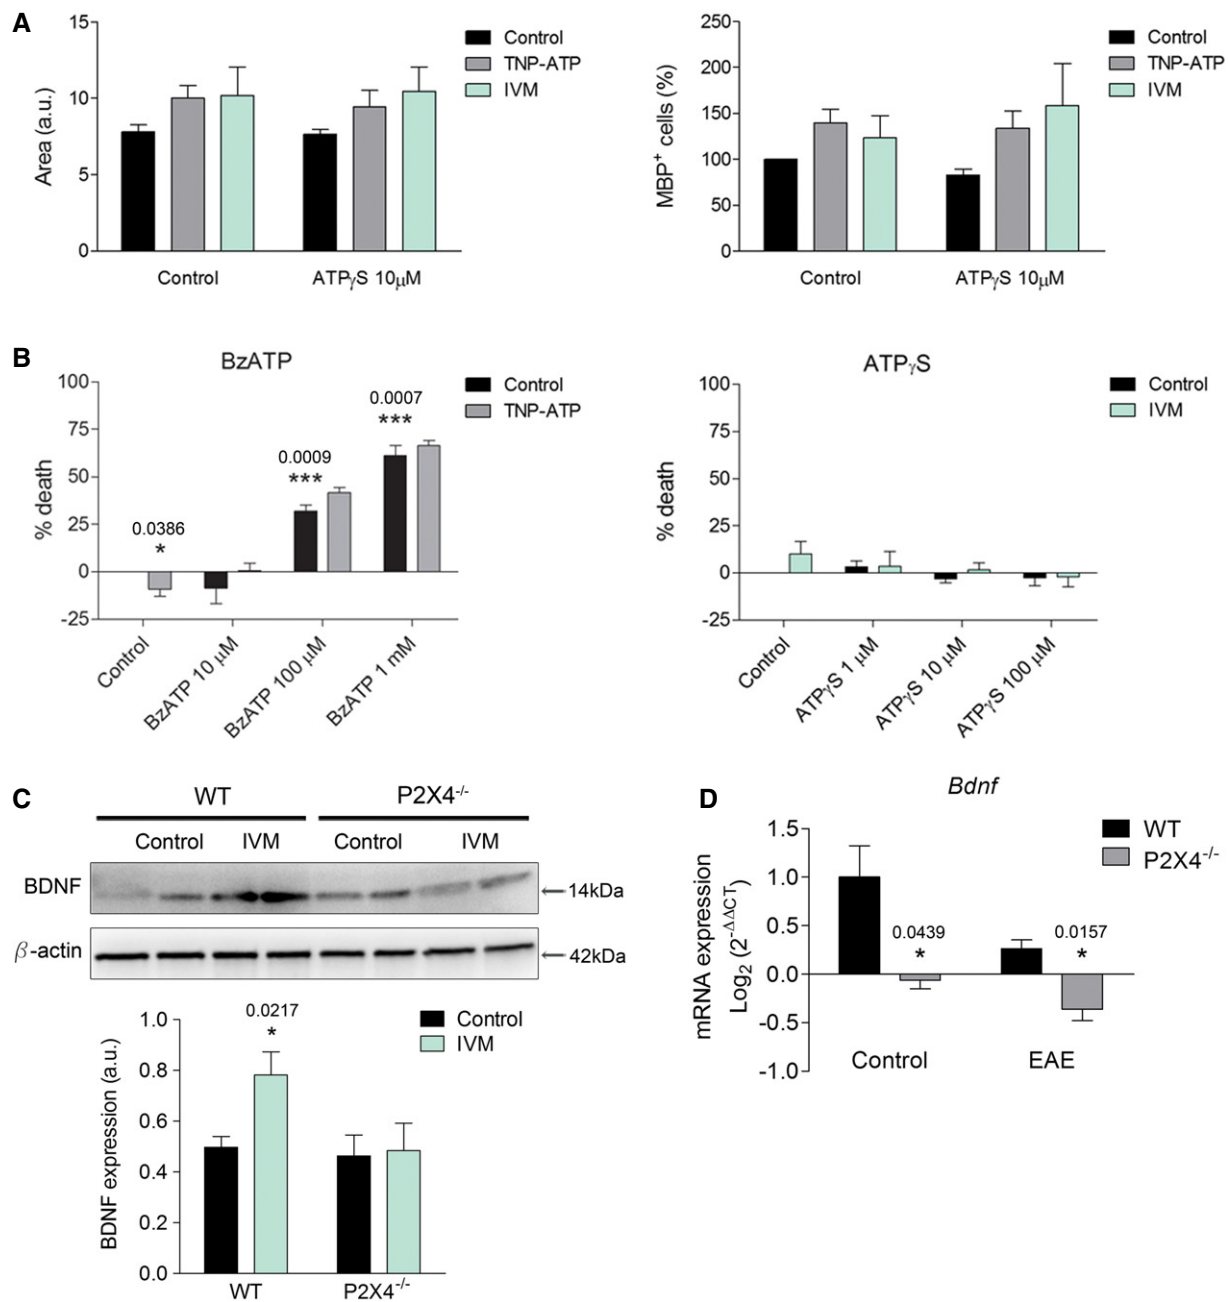

**Figure EV4. Functional role of P2X4R in oligodendrocytes in vitro.**

- A Effect of ATP $\gamma$ S (10  $\mu$ M)  $\pm$  ivermectin or TNP-ATP (10  $\mu$ M) on oligodendrocyte differentiation quantified on the basis of the number of MBP $^{+}$  cells/total cell number and the area of the cells. Area was calculated with ImageJ software ( $n = 3$ ).
- B Oligodendrocyte cell viability after 24-h incubation with BzATP, a broad-spectrum agonist of purinergic receptors, in the absence or presence of TNP-ATP (10  $\mu$ M) (left) or ATP $\gamma$ S (right) in the absence or presence of IVM (3  $\mu$ M) ( $n = 3$ ).
- C Western blot analysis of BDNF in control and IVM-treated wild-type and P2X4 $^{-/-}$  microglia ( $n = 3$ ).
- D *Bdnf* mRNA levels in the spinal cord of WT and P2X4 $^{-/-}$  mice in control and after EAE induction ( $n = 4$  mice/group).

Data information: Data are presented as mean  $\pm$  s.e.m. and were analyzed by one-way ANOVA (B) and Student's *t*-test (C, D). \* $P < 0.05$ , \*\*\* $P < 0.001$ .

Source data are available online for this figure.

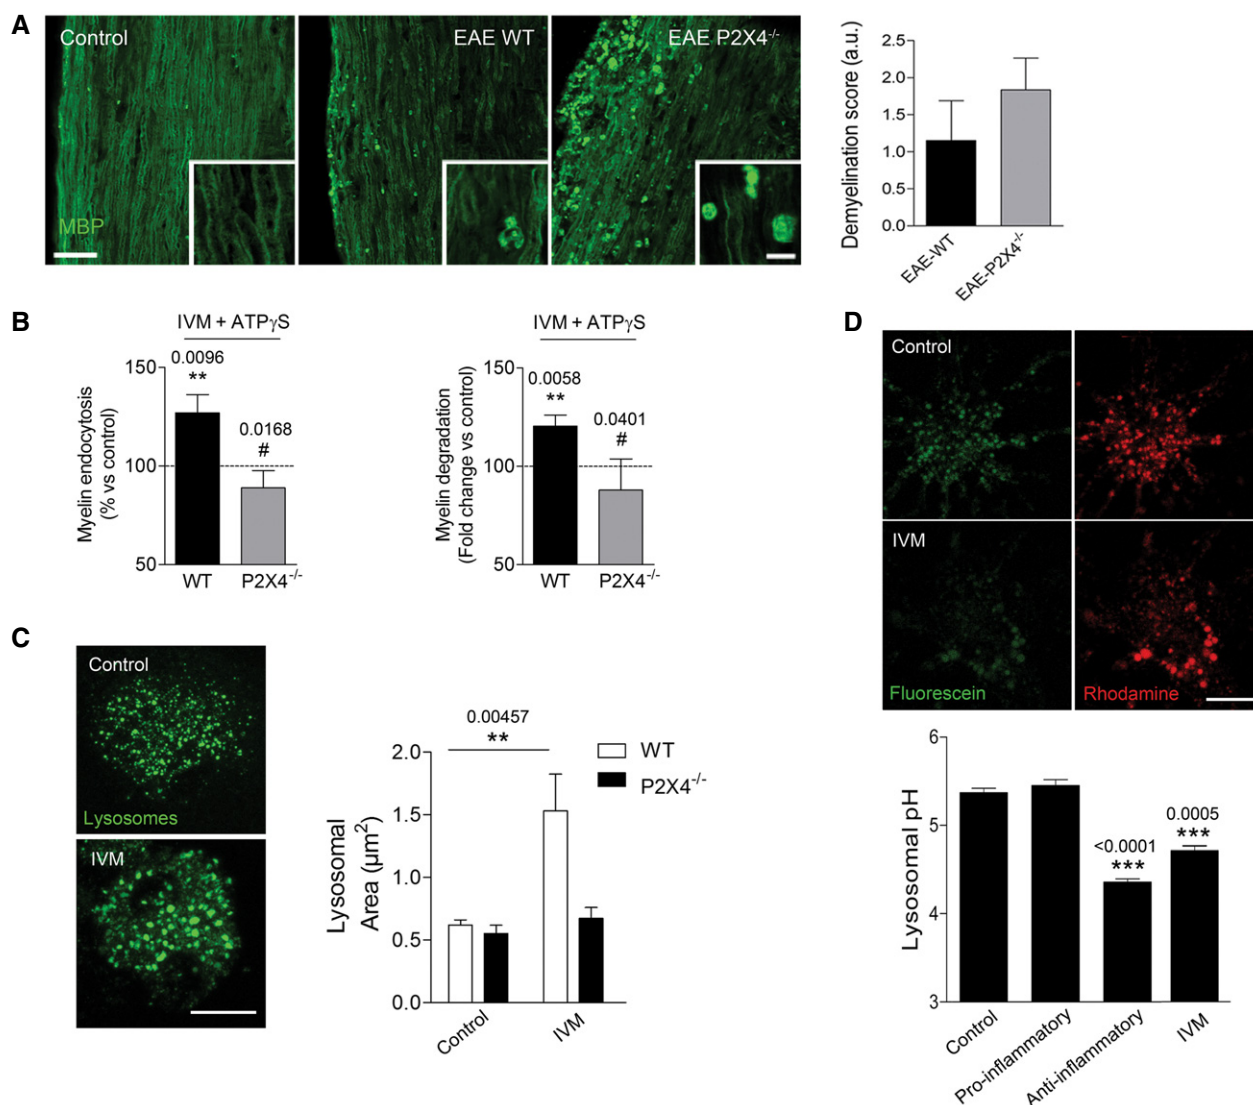

**Figure EV5. Role of P2X4R in myelin phagocytosis and lysosome function.**

**A** Spinal cord sections of wild-type ( $n = 6$ ) and P2X4<sup>-/-</sup> mice ( $n = 7$ ) 35 days after EAE induction stained for MBP. Scale bar = 50 and 10 (inset) μm. Inset images come from different fields at higher magnification. Right, demyelination score analyzed in MBP-stained sections.

**B** Effect of IVM (3 μM) on myelin endocytosis (1 h) and degradation (3 days) in microglia from wild-type and P2X4<sup>-/-</sup> mice ( $n = 3$ ).

**C** Treatment with IVM (3 μM; 16 h) increased late endosome–lysosome (LEL) size in microglia from wild-type and P2X4<sup>-/-</sup> mice. Representative images and histogram for LEL size distributions under the conditions indicated ( $n = 20$  cells from two independent experiments). Scale bar = 10 μm.

**D** IVM-treated microglia (3 μM) and anti-inflammatory microglia showed an acidic shift in lysosomal pH, as analyzed on the basis of fluorescein/rhodamine–dextran ratio ( $n = 20$  cells from two independent experiments). Scale bar = 10 μm.

Data information: Data are presented as mean ± s.e.m. and were analyzed by one-way ANOVA. # $P < 0.05$ , \*\* $P < 0.01$ , \*\*\* $P < 0.001$ . Symbols indicate significance versus control (\*) or versus pro-inflammatory microglia (#).
